# Supplementary material for: Potential Way to Develop Dengue Virus Detection in Aedes Larvae as an Alternative for Dengue Active Surveillance: A Literature Review
Source: MDPI journal article supplement (doi:10.3390/tropicalmed9030060), 2024-03-11
Supplement: s1 [file s1]

# Supplementary Materials:

Table S1. Dengue Virus Detection in Larvae

| No | Author<br>(Year)                   | Place of<br>study | Method of assay                    | Number of sample    |                        | Number of pools     |                        | Positivity rate<br>(Positive pools/Total pools x100) |                        | DENV                                    | Source of<br>infection | Pool/not<br>(Larvae)  | Larval Age            | Ref  |
|----|------------------------------------|-------------------|------------------------------------|---------------------|------------------------|---------------------|------------------------|------------------------------------------------------|------------------------|-----------------------------------------|------------------------|-----------------------|-----------------------|------|
|    |                                    |                   |                                    | Immature<br>Aegypti | Immature<br>Albopictus | Immature<br>Aegypti | Immature<br>Albopictus | Immature<br>Aegypti                                  | Immature<br>Albopictus |                                         |                        |                       |                       |      |
| 1  | Watts DM.,<br>et al. (1985)        | Thailand          | DFA                                | 5839                | NA                     | 260                 | NA                     | 0                                                    | NA                     | NA                                      | nature                 | pool of 25 or<br>less | 3rd and<br>4th instar | [13] |
| 2  | Castro MG.<br>et al. (2004)        | Brazil            | nested RT-PCR<br>from cell culture | 521                 | 284                    | 37                  | 39                     | 32,4% (12)                                           | 46,2% (n=18)           | DENV 2                                  | Lab                    | 4 to 23/pool          | 4th instar            | [14] |
| 3  | Medeiros<br>AS., et al.<br>(2018)  | Brazil            | nested RT-PCR                      | 1186                | 147                    | 46                  | 13                     | 8,7% (4)                                             | 0% (n=0)               | DENV 1,<br>DENV 2,<br>DENV 4            | nature                 | pool of 40 or<br>less | NA                    | [15] |
| 4  | Khan J., et al<br>(2017)           | Pakistan          | nested RT-PCR                      | 300                 | 210                    | 10                  | 7                      | 20% (n=2)                                            | 14,29% (n=1)           | DENV 2,<br>DENV 3                       | nature                 | 30/pool               | NA                    | [16] |
| 5  | Lee HL., et<br>al. (2005)          | Malaysia          | PAP staining<br>from cell culture  | 3579                | 19343                  | 150                 | 777                    | 2% (n=3)                                             | 0,9% (n=7)             | NA                                      | nature                 | 25/pool               | 3rd instar            | [17] |
| 6  | Teixeira AF.,<br>et al. (2021)     | Brazil            | qRT-PCR                            | 450                 | NA                     | 30                  | NA                     | 13,3% (n=4)                                          | NA                     | NA                                      | nature                 | 15/pool               | NA                    | [18] |
| 7  | Da Costa CF.,<br>et al.(2017)      | Amazon            | qRT-PCR                            | 3956                | NA                     | 146                 | NA                     | 47,9% (n=70)                                         | NA                     | DENV 1,<br>DENV 2,<br>DENV 4            | nature                 | pool of 30 or<br>less | 3rd and<br>4th instar | [19] |
| 8  | Andrade,<br>EHP., et al.<br>(2022) | Brazil            | qRT-PCR                            | NA                  | NA                     | 28                  | NA                     | 32,1% (n=9)                                          | NA                     | DENV 1,<br>DENV 2,<br>DENV 3,<br>DENV 4 | nature                 | pool of 10 or<br>less | 3rd and<br>4th instar | [20] |
| 9  | Mulyatno<br>KC., et al.<br>(2012)  | Indonesia         | RT- PCR                            | 550                 | NA                     | 28                  | NA                     | 10,7 (n=3)                                           | NA                     | DENV 1,<br>DENV 2                       | nature                 | 20/pool               | NA                    | [21] |
| 10 | Wijesinghe<br>(2021)               | Sri Lanka         | RT-PCR                             | NA                  | NA                     | 49                  | 122                    | 9,8% (n=12)                                          | 8,1% (n=4)             | DENV 1,<br>DENV 2,<br>DENV 3,<br>DENV 4 | nature                 | pool of 10 or<br>less | 3rd and<br>4th instar | [22] |

|    |                                     |          |                                    |                                                                                                        |      |                                                                                                   |     |                                                                                                      |                |                                                      |        |                    |            |      |
|----|-------------------------------------|----------|------------------------------------|--------------------------------------------------------------------------------------------------------|------|---------------------------------------------------------------------------------------------------|-----|------------------------------------------------------------------------------------------------------|----------------|------------------------------------------------------|--------|--------------------|------------|------|
| 11 | Vilela AP., et al. (2006)           | Brazil   | RT-PCR                             | 5573                                                                                                   | NA   | 101                                                                                               | NA  | 0,9% (1)                                                                                             | NA             | DENV 3                                               | nature | pool of 50 or less | NA         | [23] |
| 12 | Cecilio SG., et al. (2015)          | Brazil   | RT-PCR                             | 945                                                                                                    | 168  | 54 (not specified)                                                                                |     | (n=4)                                                                                                | NA             | NA                                                   | nature | pool of 40 or less | 4th instar | [24] |
| 13 | Pinheiro VCS., et al.(2005)         | Brazil   | RT-PCR                             | 1142                                                                                                   | NA   | 59                                                                                                | NA  | 11,86% (n=7)                                                                                         | NA             | DENV 3                                               | nature | 4 to 49/pool       | NA         | [25] |
| 14 | Teo CHJ, et al. (2017)              | Malaysia | RT-PCR                             | 16                                                                                                     | 284  | 16                                                                                                | 284 | 25% (n=4)                                                                                            | 25,7% (n=73) ; | DENV 2,<br>DENV 3,<br>DENV 4                         | nature | individual         | NA         | [26] |
| 15 | Rohani A, et al. (2014)             | Malaysia | RT-PCR                             | 137                                                                                                    | 2703 | 363 (not specified)                                                                               |     | 5 pools                                                                                              | 18 pools       | DENV 2,<br>DENV 3,                                   | nature | 15 to 20/pool      | NA         | [27] |
| 16 | Sithiprasasna R., et al. (1994))    | Thailand | ELISA                              | NA                                                                                                     | NA   | DEN 1 = 46;<br>DEN 2 = 41;<br>DEN 3 = 35;<br>DEN 4 = 42                                           | NA  | DEN 1 = 63%<br>(n=29); DEN 2 =<br>51% (n=21); DEN<br>3 = 69% (n=24) ;<br>DEN 4 = 83%<br>(n=35)       | NA             | DENV 1,<br>DENV 2,<br>DENV 3,<br>DENV 4              | Lab    | 1 to 100/pool      | 4th instar | [28] |
| 17 | Gutierrez-Bugallo G., et al. (2017) | Cuba     | RT-PCR                             | 270                                                                                                    | NA   | 9                                                                                                 | NA  | 33,3% (n=3)                                                                                          | NA             | DENV 3                                               | nature | 30/pool            | NA         | [29] |
| 18 | Granados JSM., et al. (2022)        | Colombia | RT-PCR                             | 366                                                                                                    | NA   | 16                                                                                                | NA  | 31,25% (n=5)                                                                                         | NA             | DENV 1,<br>DENV 2,<br>DENV 3,<br>CHIKV,<br>ZIKV, YFV | nature | 20/pool            | NA         | [30] |
| 19 | Sanchez-Vargas I. et al. (2018)     | Mexico   | IFA and RT-N-PCR from cell culture | E2-7d<br>PCR/IFA=<br>2380/2380<br>; E2-10d<br>PCR/IFA =<br>1420/90;<br>E2-21d<br>PCR/IFA =<br>760/1020 | NA   | E2-7d<br>PCR/IFA =<br>119/119 ;<br>E2-10d<br>PCR/IFA =<br>71/49; E2-<br>21d<br>PCR/IFA =<br>38/51 | NA  | E2-7d PCR/IFA =<br>26%/19,3% ; E2-<br>10d PCR/IFA =<br>55%/55% ; E2-<br>21d PCR/IFA =<br>97,3% 68,6% | NA             | DENV 2                                               | Lab    | 20/pool            | 4th instar | [31] |
| 20 | Gutierrez-Bugallo G., et al. (2018) | Cuba     | RT-PCR                             | NA                                                                                                     | 542  | NA                                                                                                | 26  | 33,3% (n=37)                                                                                         | NA             | DENV 1,<br>DENV 2,<br>DENV 3,<br>DENV 4              | nature | 30 to 55/pool      | NA         | [32] |

|    |                                  |          |                                           |      |        |                               |                          |                                                                 |                                                                  |                                |        |                             |                    |      |
|----|----------------------------------|----------|-------------------------------------------|------|--------|-------------------------------|--------------------------|-----------------------------------------------------------------|------------------------------------------------------------------|--------------------------------|--------|-----------------------------|--------------------|------|
| 21 | Rohani A., et al. (2007)         | Malaysia | RT-PCR and PAP staining from cell culture | 3780 | 5530   | 378                           | 553                      | RT-PCR = 5% (n=19) ; PAP staing from cell culture = 8,7% (n=33) | RT-PCR = 1,1% (n=6) ; PAP staing from cell culture = 3,1% (n=17) | DENV1 , DENV 3                 | nature | 10/pool                     | 3rd and 4th instar | [33] |
| 22 | Pessanha JEM. et al. (2007)      | Brazil   | RT-PCR                                    | 1400 | 17     | Individual = 293 ; pool = 142 | Individual = 8; pool = 2 | Individual = 37,5% (n=110) ; pool = 37,3% (n=53)                | Individual = 50% (n=4) ; pool = 50% (n=1)                        | DENV 1, DENV 2, DENV 3         | nature | individual and 2 to 10/pool | NA                 | [34] |
| 23 | Johari NA., et al. (2019)        | Malaysia | nested RT-PCR                             | 364  | 1025   | 364                           | 1025                     | 2,47% (n=9)                                                     | 2,05% (n=21)                                                     | DENV 1, DENV 2, DENV 3, DENV 4 | nature | Individual                  | NA                 | [35] |
| 24 | Piedra LA., et al. (2022)        | Cuba     | RT-PCR                                    | NA   | 450    | NA                            | 15                       | NA                                                              | 26,67% (n=4)                                                     | DENV 3                         | nature | 30/pool                     | NA                 | [36] |
| 25 | De Figueiredo ML., et al. (2010) | Brazil   | RT-PCR                                    | 270  | NA     | 9                             | NA                       | NA                                                              | 11,5% (n=3)                                                      | DENV 1, DENV 2, DENV 3         | nature | 10/pool                     | NA                 | [37] |
| 26 | Serufo JC., et al. (1993)        | Brazil   | IFA AND PCR                               | NA   | 1128 ; | NA                            | NA                       | NA                                                              | (n=2)                                                            | DENV 1                         | nature | pool of 30 or less          | NA                 | [38] |
| 27 | Sivan A., et al. (2016)          | India    | RT-PCR                                    | 89   | 691    | 6                             | 23                       | 0                                                               | 0                                                                | DENV 3                         | nature | 20/pool                     | NA                 | [39] |
| 28 | Gunther J., et al. (2007)        | Mexico   | RT-PCR                                    | 620  | NA     | 31                            | NA                       | 0                                                               | NA                                                               | DENV 2, DENV 3, DENV 4         | nature | 20/pool                     | NA                 | [40] |
| 29 | Zeidler JD., et al. (2007)       | Brazil   | RT-PCR                                    | 1172 | NA     | 44                            | NA                       | 0                                                               | NA                                                               | NA                             | nature | pool of 30 or less          | 3rd and 4th instar | [41] |
